# Supplementary material for: Impact of quality of evidence on the strength of recommendations: an empirical study
Source: PubMed Central journal article supplement (PMC2722589; doi:10.1186/1472-6963-9-120), 2009-07-21

**Q1: Should FFP (vs. no FFP) be recommended for patients requiring massive transfusion?**

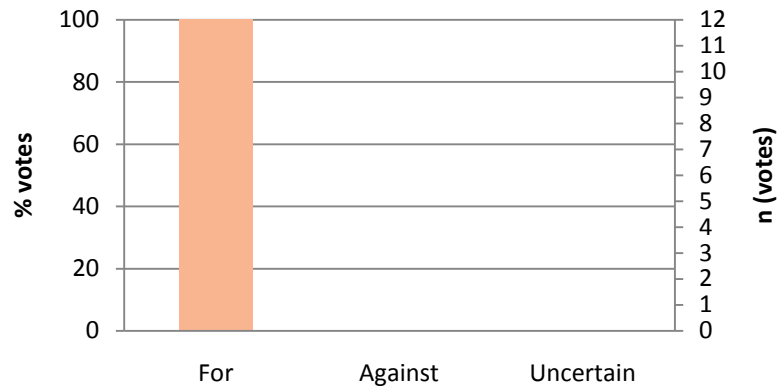

**Q1: Strength of recommendations for using FFP (vs. no FFP) for patients requiring massive transfusion**

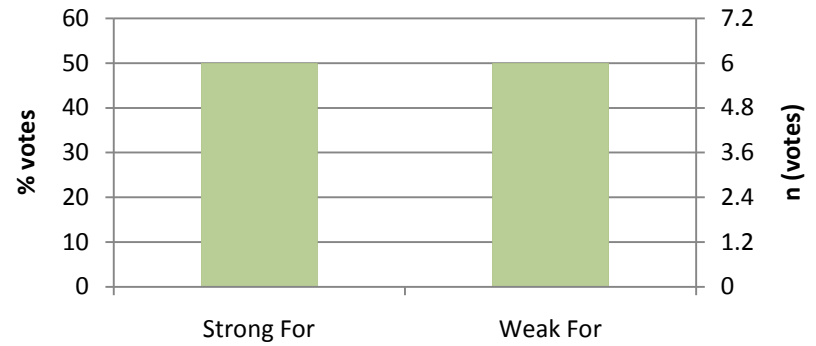

**Q1: Quality of supporting evidence**

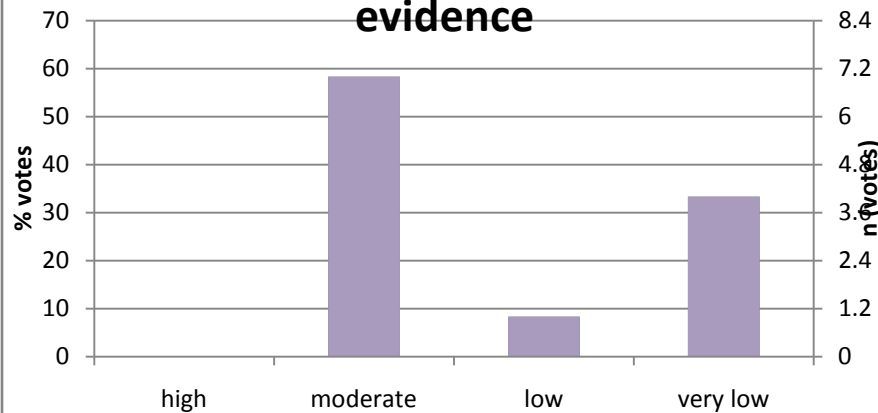

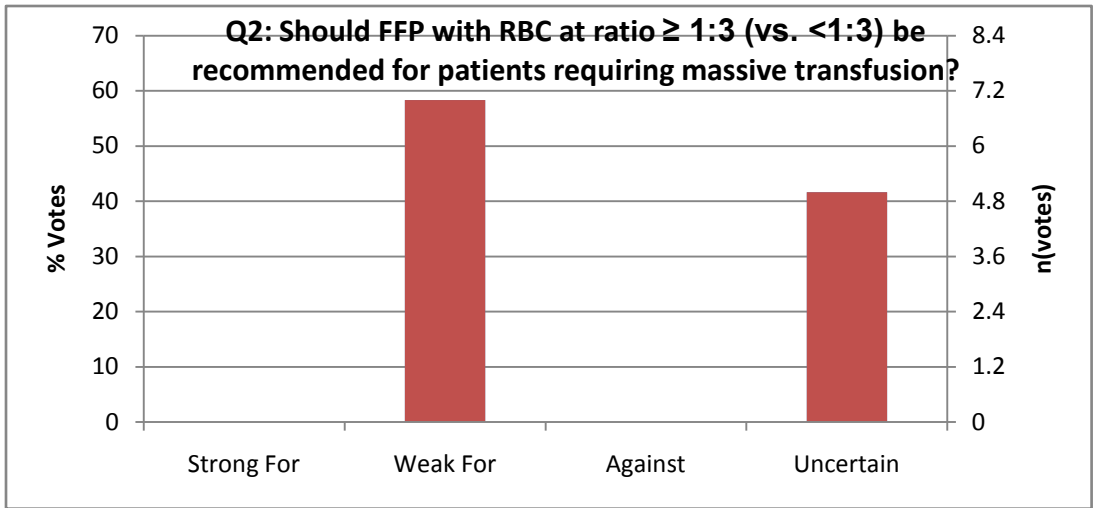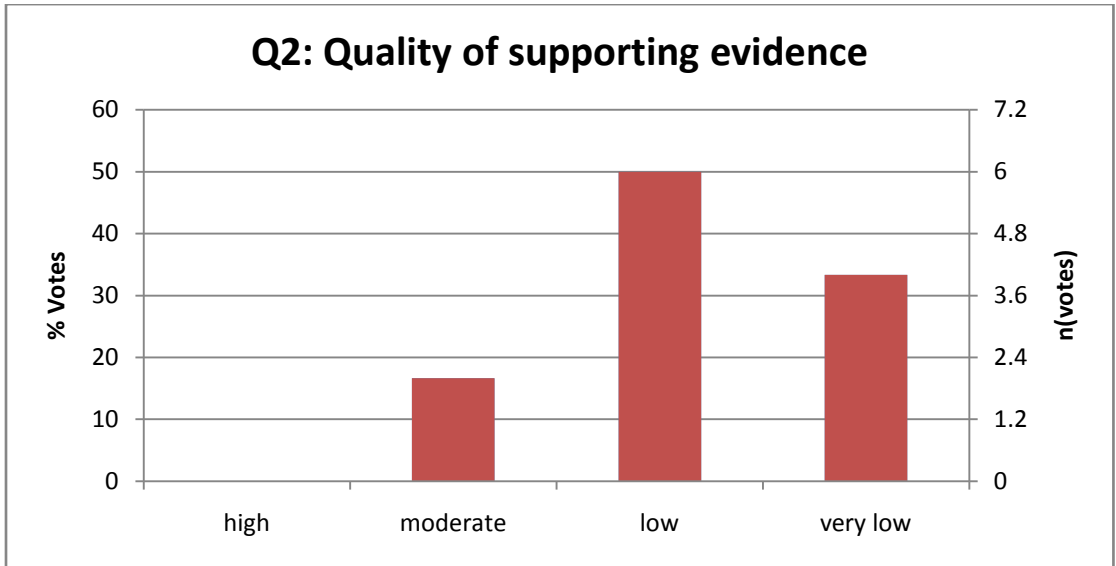

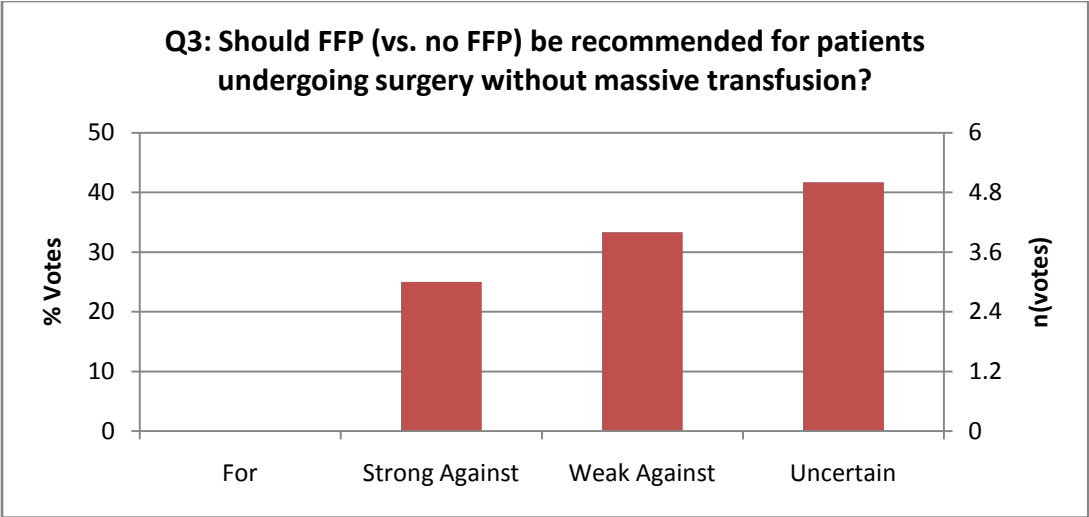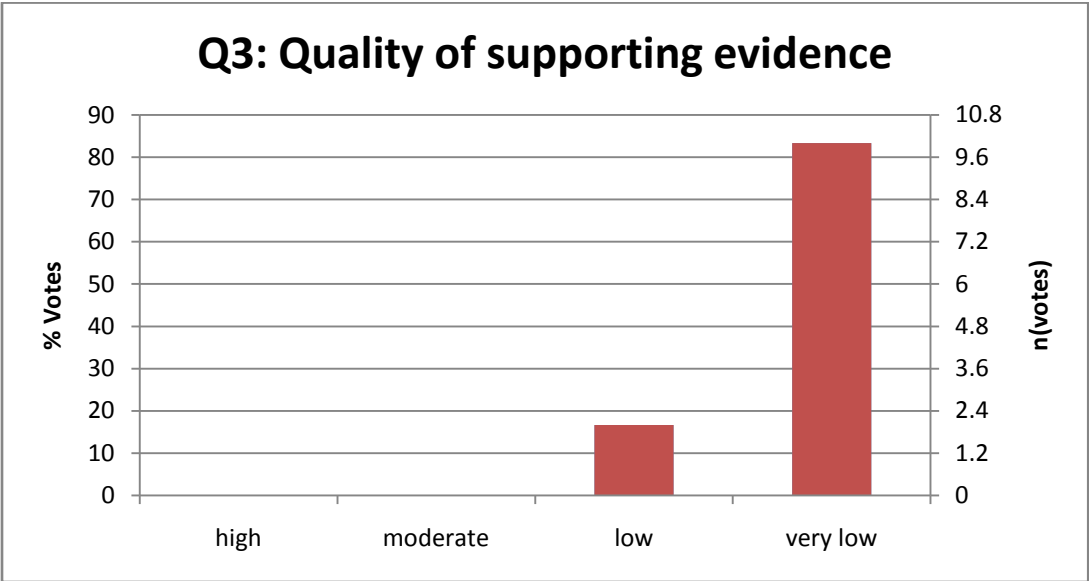

**Q4: Should FFP (vs. no FFP) be recommended for medical patients who not bleeding, undergoing surgery, or massive transfusion?**

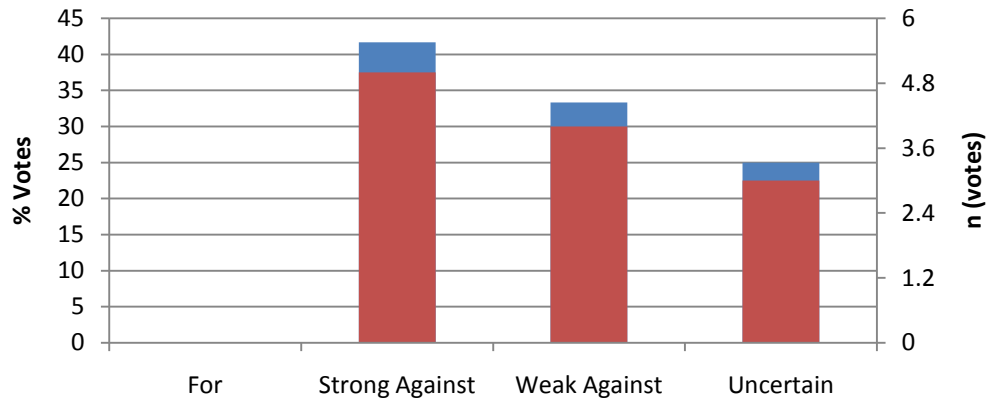

**Q4: Quality of supporting evidence**

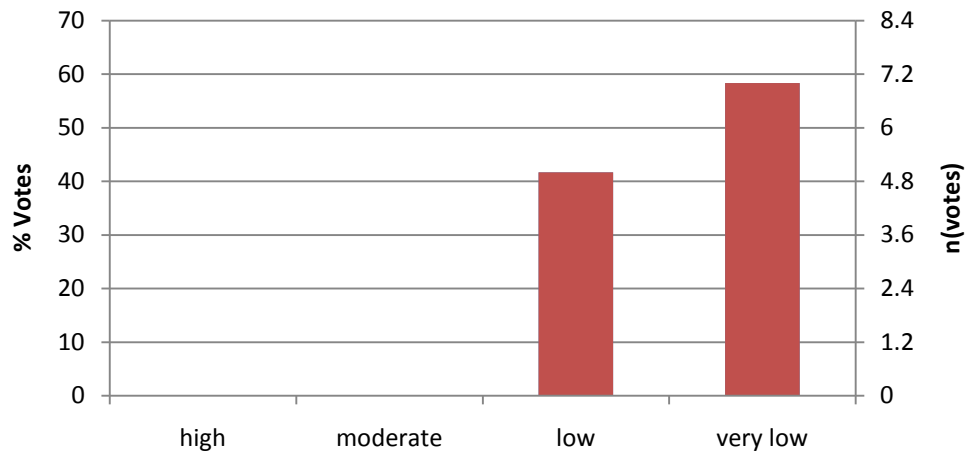

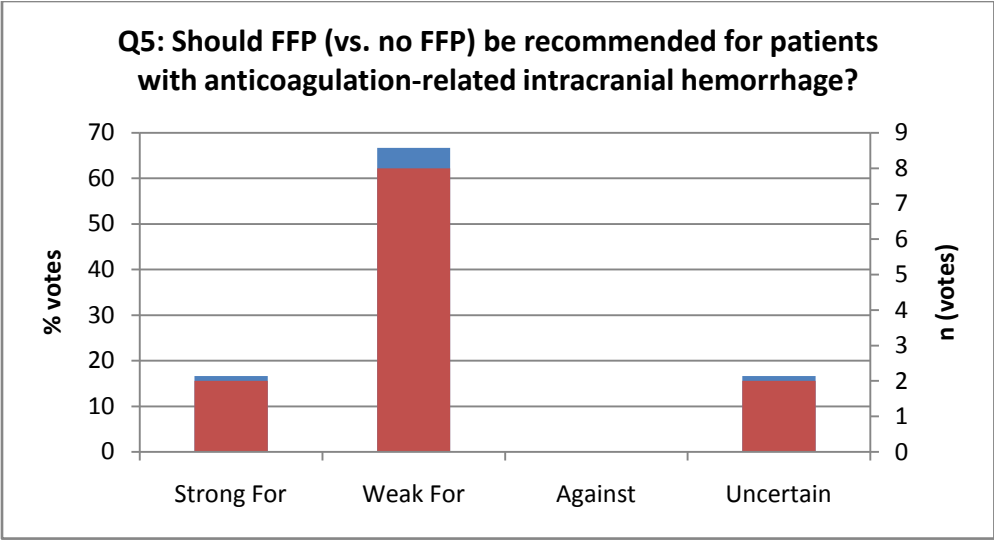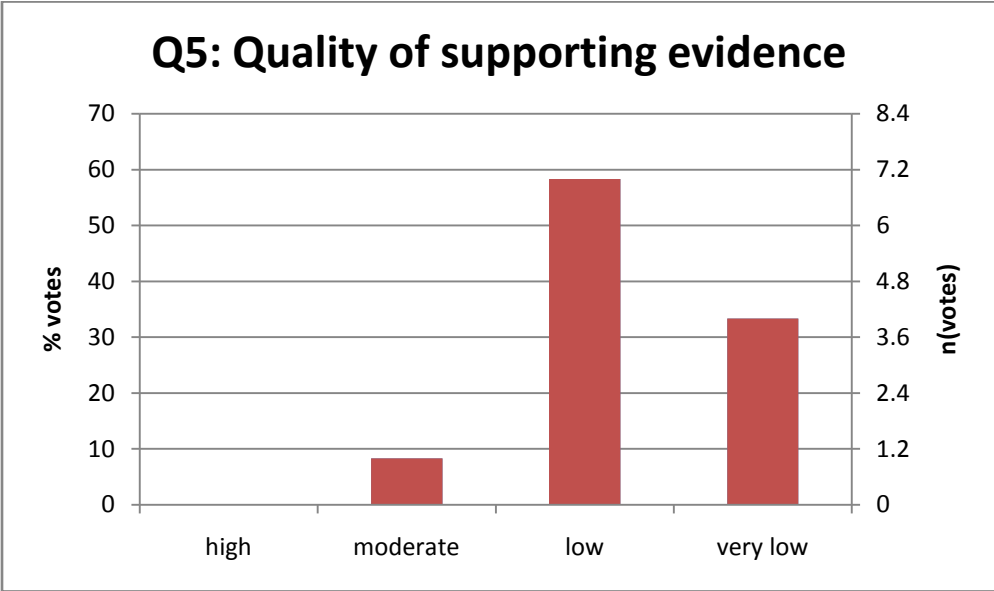

**Q6: Should FFP (vs. no FFP) be used to reverse anticoagulation in patients with intracranial hemorrhage?**

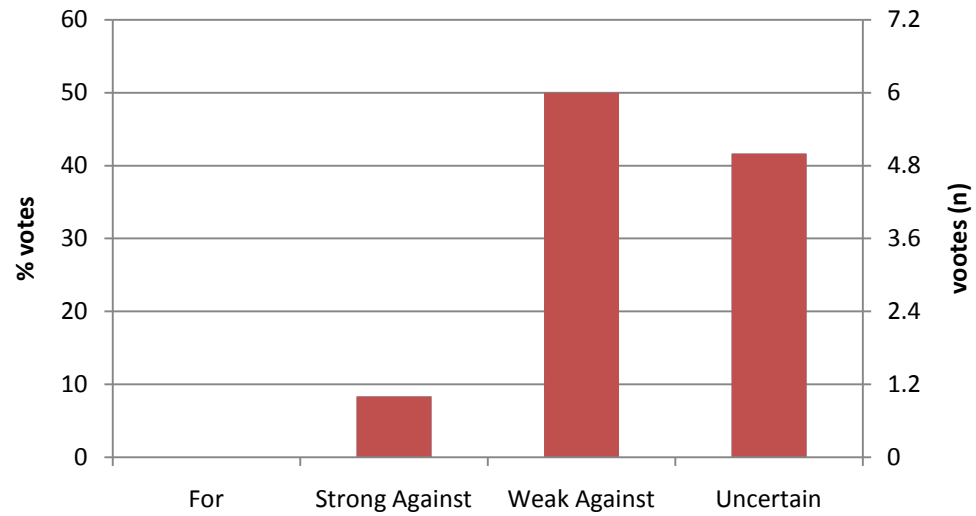

**Q6: Quality of evidence**

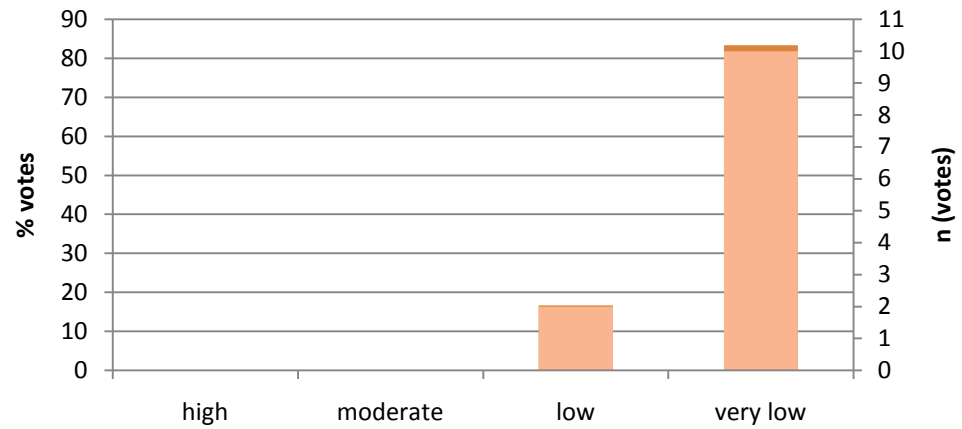

Supplement: 1472-6963-9-120-S1.pdf [file 1472-6963-9-120-S1.pdf]
